# Supplementary material for: Polyoxometalate-supported Pd nanoparticles as efficient catalysts for the direct synthesis of hydrogen peroxide in the absence of acid or halide promoters
Source: Royal Society of Chemistry journal article supplement (doi:10.1039/b910317a), 2009-01-01
Supplement: b910317a.pdf [file b910317a.pdf]

# Polyoxometalate-supported Pd nanoparticles as efficient catalysts for the direct synthesis of hydrogen peroxide in the absence of acid or halide promoters

Miao Sun, Jizhe Zhang, Qinghong Zhang,\* Ye Wang and Huilin Wan\*

*State Key Laboratory of Physical Chemistry of Solid Surfaces, National Engineering Laboratory for Green Chemical Productions of Alcohols, Ethers and Esters, Department of Chemistry, College of Chemistry and Chemical Engineering, Xiamen University, Xiamen 361005, China*

## Electronic Supplementary Information

### 1. Experimental details

#### (1) Catalyst preparation

The Cs salts of tungstophosphates with different Cs contents ( $\text{Cs}_x\text{H}_{3-x}\text{PW}_{12}\text{O}_{40}$ ,  $x = 0.5-3.0$ ) were prepared by a reaction between  $\text{H}_3\text{PW}_{12}\text{O}_{40}$  and  $\text{Cs}_2\text{CO}_3$ . The precipitates obtained after the addition of the aqueous solution of  $\text{Cs}_2\text{CO}_3$  into that of  $\text{H}_3\text{PW}_{12}\text{O}_{40}$  were recovered by filtration, followed by washing with water, drying and calcination at 673 K for 2 h to obtain the  $\text{Cs}_x\text{H}_{3-x}\text{PW}_{12}\text{O}_{40}$  samples. The Pd/ $\text{Cs}_x\text{H}_{3-x}\text{PW}_{12}\text{O}_{40}$  catalysts were prepared by impregnation of the  $\text{Cs}_x\text{H}_{3-x}\text{PW}_{12}\text{O}_{40}$  with PdCl<sub>2</sub> aqueous solution, followed by drying, calcination at 573 K in air, and reduction by H<sub>2</sub> at 573 K.

#### (2) Catalyst characterization

XRD, N<sub>2</sub> sorption, TEM, XPS and NH<sub>3</sub>-TPD were used to characterize the structures and the physicochemical properties of the Pd/ $\text{Cs}_x\text{H}_{3-x}\text{PW}_{12}\text{O}_{40}$  catalysts. XRD patterns were recorded on a Panalytical X'Pert Pro Super X-ray diffractometer equipped with X'Celerator detection system. Cu-K<sub>α</sub> radiation (40 kV and 30 mA) was used as the X-ray source. N<sub>2</sub> sorption at 77 K was carried out with a Micromeritics Tristar 3000 surface and porosimetry analyzer. TEM measurements were performed on a Tecnai F30 electron microscope (Phillips Analytical) operated at an acceleration voltage of 300 kV. Samples for TEM measurements were suspended in ethanol and dispersed ultrasonically. Drops of the suspensions were applied on a copper grid coated with carbon. NH<sub>3</sub>-TPD measurements were performed using a Micromeritics AutoChem II 2920 instrument connected to a ThermoStar GSD 301 T2 mass spectrometer.

#### (3) Catalytic reaction

Catalytic reactions were performed under atmospheric pressure and at 283 K in a glass reactor. H<sub>2</sub> and O<sub>2</sub> were added via a glass frit to the stirred slurry containing the solvent (ethanol) and the catalyst. H<sub>2</sub> conversion was analyzed by on-line gas chromatography, and the concentration of H<sub>2</sub>O<sub>2</sub> was measured with colorimetry after complexation with a

TiOSO<sub>4</sub>/H<sub>2</sub>SO<sub>4</sub> reagent.

## 2. XRD patterns of the Cs<sub>x</sub>H<sub>3-x</sub>PW<sub>12</sub>O<sub>40</sub> and the Pd/Cs<sub>x</sub>H<sub>3-x</sub>PW<sub>12</sub>O<sub>40</sub> samples

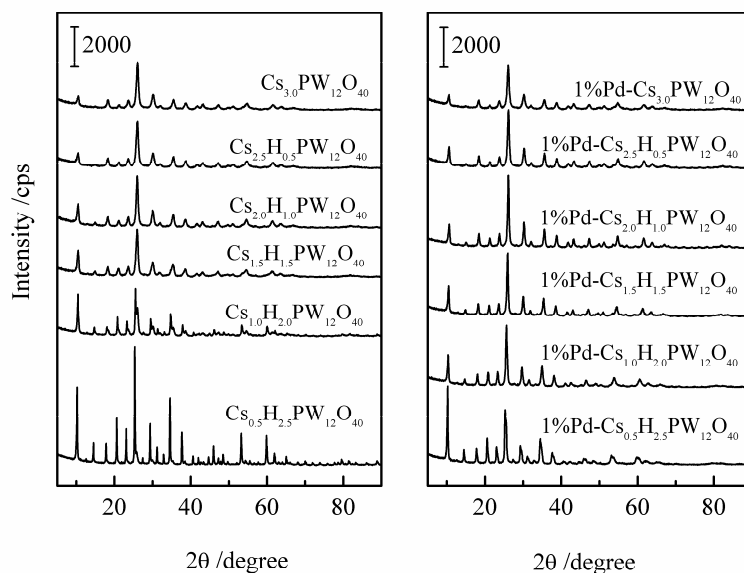

**Fig. S1** XRD patterns of the Cs<sub>x</sub>H<sub>3-x</sub>PW<sub>12</sub>O<sub>40</sub> and the 1.0 wt% Pd/Cs<sub>x</sub>H<sub>3-x</sub>PW<sub>12</sub>O<sub>40</sub> samples.

## 3. Surface areas of the Cs<sub>x</sub>H<sub>3-x</sub>PW<sub>12</sub>O<sub>40</sub> samples

**Table S1** BET surface areas of the Cs<sub>x</sub>H<sub>3-x</sub>PW<sub>12</sub>O<sub>40</sub> samples

| Sample                                                              | Surface area /m <sup>2</sup> g <sup>-1</sup> |
|---------------------------------------------------------------------|----------------------------------------------|
| Cs <sub>0.5</sub> H <sub>2.5</sub> PW <sub>12</sub> O <sub>40</sub> | 2.0                                          |
| Cs <sub>1.0</sub> H <sub>2.0</sub> PW <sub>12</sub> O <sub>40</sub> | 13                                           |
| Cs <sub>1.5</sub> H <sub>1.5</sub> PW <sub>12</sub> O <sub>40</sub> | 10                                           |
| Cs <sub>2.0</sub> H <sub>1.0</sub> PW <sub>12</sub> O <sub>40</sub> | 14                                           |
| Cs <sub>2.5</sub> H <sub>0.5</sub> PW <sub>12</sub> O <sub>40</sub> | 106                                          |
| Cs <sub>3.0</sub> PW <sub>12</sub> O <sub>40</sub>                  | 104                                          |

## 4. NH<sub>3</sub>-TPD profiles of the Pd/Cs<sub>1.5</sub>H<sub>1.5</sub>PW<sub>12</sub>O<sub>40</sub> samples with different Pd loadings

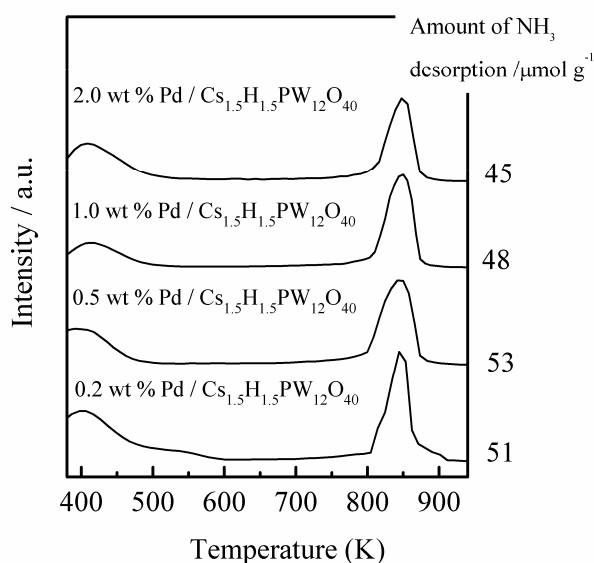

**Fig. S2** NH<sub>3</sub>-TPD profiles of the Pd/Cs<sub>1.5</sub>H<sub>1.5</sub>PW<sub>12</sub>O<sub>40</sub> samples with different Pd loadings. The amount of NH<sub>3</sub> desorption for the main peak at 800-900 K was listed in the figure.

### 5. TEM micrographs and particle size distributions for the 1.0 wt% Pd/Cs<sub>x</sub>H<sub>3-x</sub>PW<sub>12</sub>O<sub>40</sub> samples

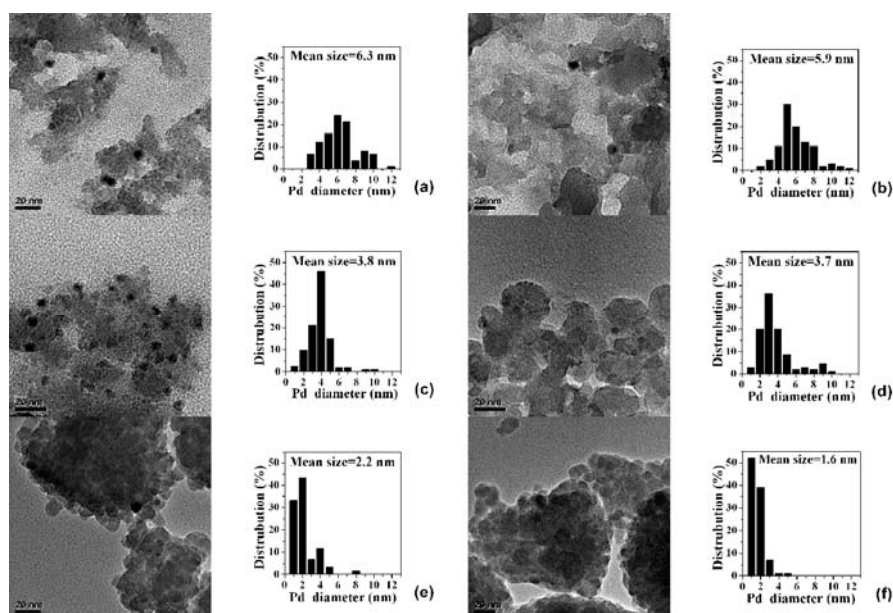

**Fig. S3** TEM micrographs and particle size distributions for the 1.0 wt% Pd/Cs<sub>x</sub>H<sub>3-x</sub>PW<sub>12</sub>O<sub>40</sub> samples. (a)  $x = 0.5$ , (b)  $x = 1.0$ , (c)  $x = 1.5$ , (d)  $x = 2.0$ , (e)  $x = 2.5$ , (f)  $x = 3.0$ .

## 6. TEM micrograph and particle size distribution for the 2.0 wt% Pd/ Cs<sub>1.5</sub>H<sub>1.5</sub>PW<sub>12</sub>O<sub>40</sub> sample

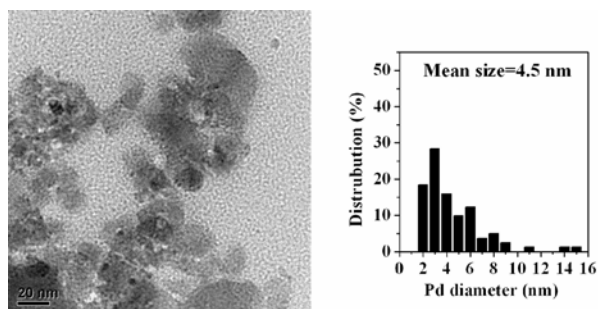

**Fig. S4** TEM micrograph and particle size distribution for the 2.0 wt% Pd/Cs<sub>1.5</sub>H<sub>1.5</sub>PW<sub>12</sub>O<sub>40</sub> sample.
